# Supplementary material for: SR-FTIR imaging of the altered cadmium sulfide yellow paints in Henri Matisse's Le Bonheur de vivre (1905–6) – examination of visually distinct degradation regions
Source: Royal Society of Chemistry journal article supplement (doi:10.1039/c3an00892d), 2013-01-01
Supplement: c3an00892d.pdf [file c3an00892d.pdf]

## SR-FTIR Imaging of the Altered Cadmium Sulfide Yellow Paints in Henri Matisse's *Le Bonheur de vivre* (1905-6) – Examination of Visually Distinct Degradation Regions

Jennifer Mass<sup>\*a</sup>, Julia Sedlmair<sup>b</sup>, Catherine Schmidt Patterson<sup>c</sup>, David Carson<sup>c</sup>, Barbara Buckley<sup>d</sup> Carol Hirschmugl<sup>e</sup>

<sup>a</sup>Winterthur Museum, Conservation Department, 5100 Kennett Pike, Winterthur, USA E-mail: [jmass@winterthur.org](mailto:jmass@winterthur.org); Tel:1-302-888-4808

<sup>b</sup>Synchrotron Radiation Center, University of Wisconsin-Madison, Stoughton, WI 53589

<sup>c</sup>Getty Conservation Institute, 1200 Getty Center Drive, Suite 700, Los Angeles, USA

<sup>d</sup>The Barnes Foundation, Conservation Department, 2025 Benjamin Franklin Parkway, Philadelphia, USA

<sup>e</sup>Department of Physics, University of Wisconsin-Milwaukee, 1900 East Kenwood Blvd, Milwaukee, USA

### Supplementary Electronic Material

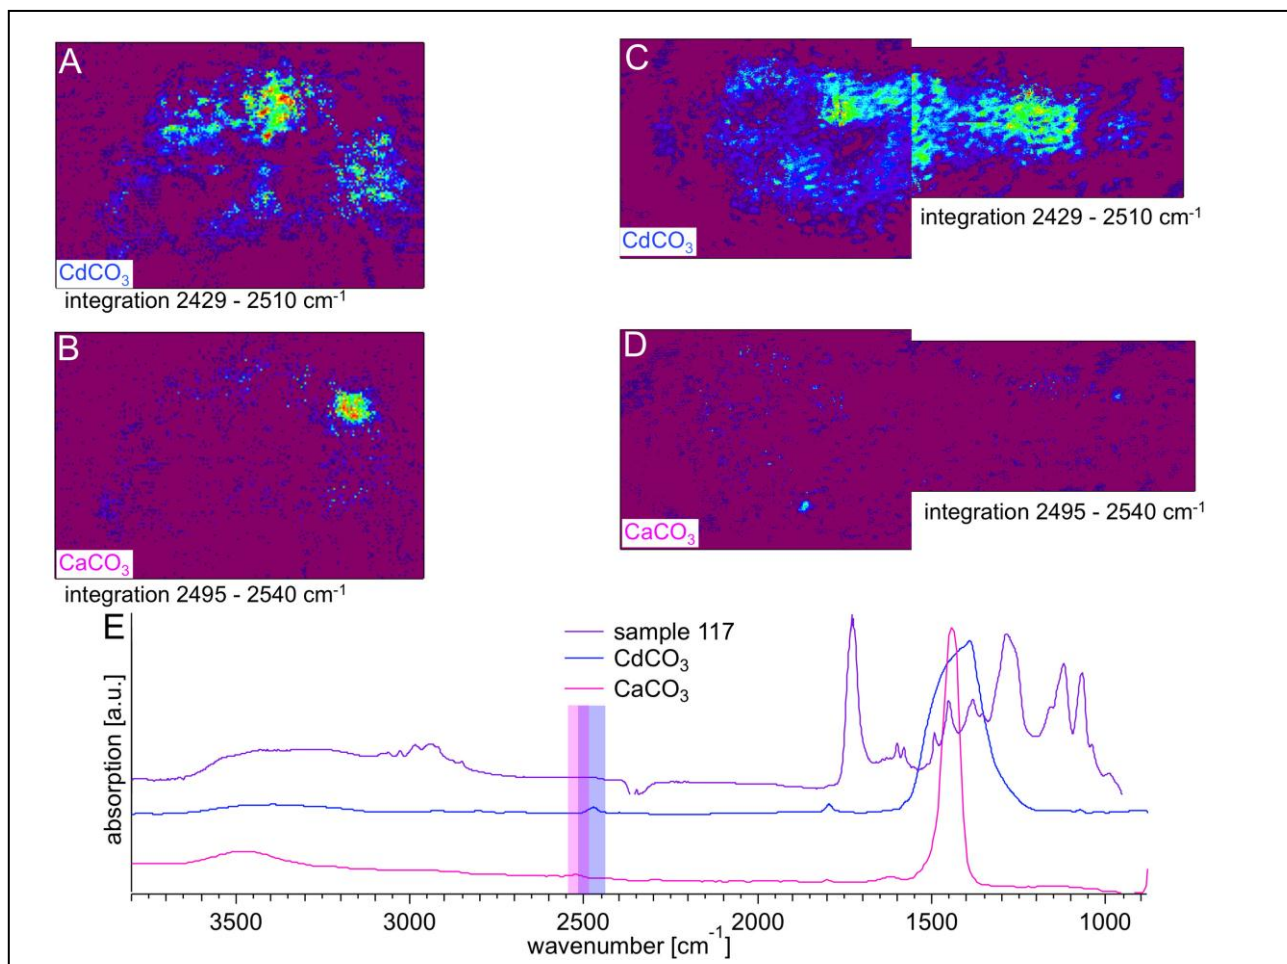

**Supplementary Electronic Material Figure 1.** Distribution of carbonates in samples S113 and S117, demonstrating that when the region between 2495-2540 cm<sup>-1</sup> is integrated for sample S117 an inclusion that appears to represent calcium carbonate rather than cadmium carbonate is visible.

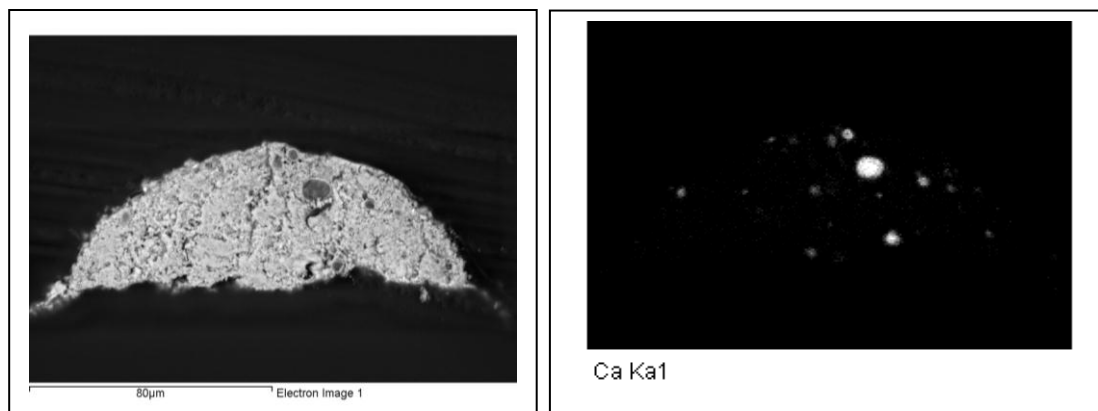

**Supplementary Information Figure 2.** Backscattered electron image of the block face of sample S113 and calcium map of S113 revealing a high concentration of Ca in the same location as the vibration corresponding to the  $\text{CaCO}_3$  band at  $2495\text{ cm}^{-1}$  to  $2540\text{ cm}^{-1}$ , further corroborating its assignment as a band belonging to  $\text{CaCO}_3$  rather than  $\text{CdCO}_3$ .

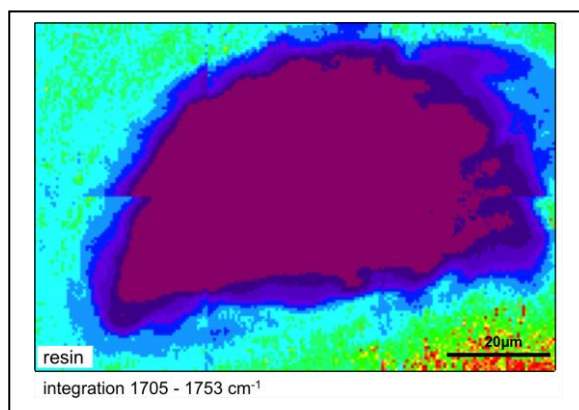

**Supplementary Information Figure 3.** Sample S113 map of Bio-Plastic resin carbonyl band demonstrating its exclusion from the sample region.
